# Supplementary material for: Characteristic bimodal profiles of RNA polymerase II at thousands of active mammalian promoters
Source: PubMed Central journal article supplement (PMC4197824; doi:10.1186/gb-2014-15-6-r85), 2014-06-12

### a CpG profiles

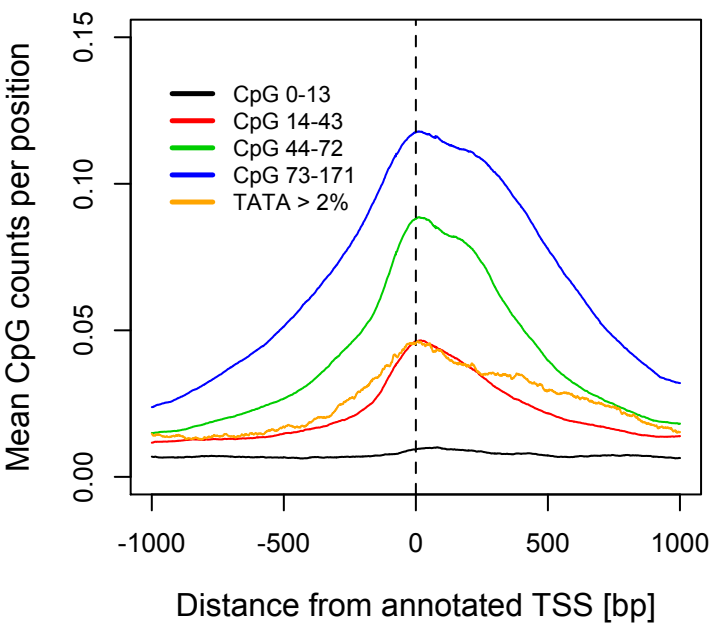

### b

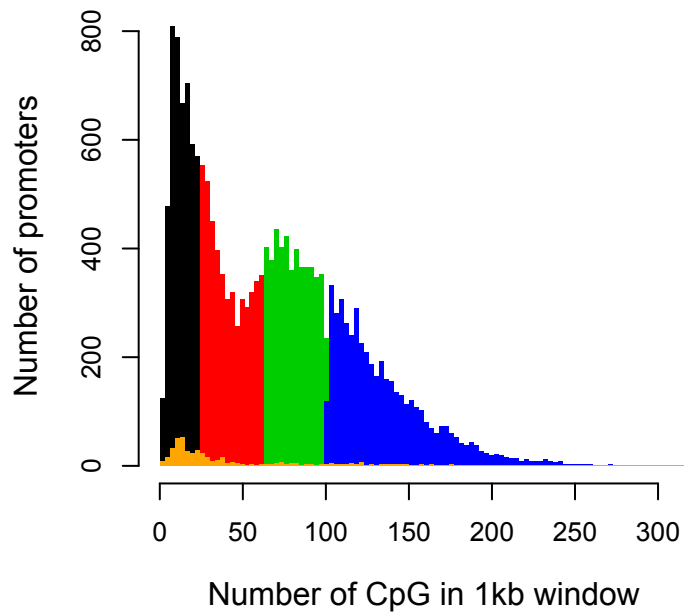

### c GC profiles

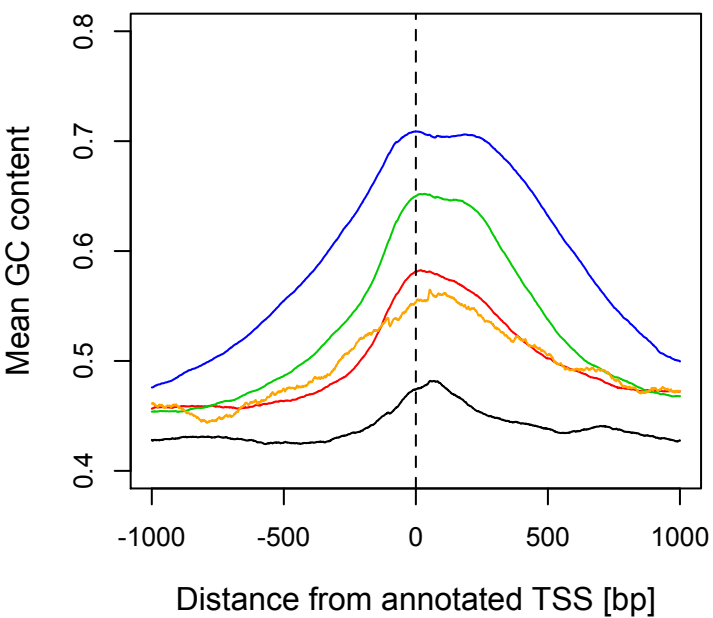

### d

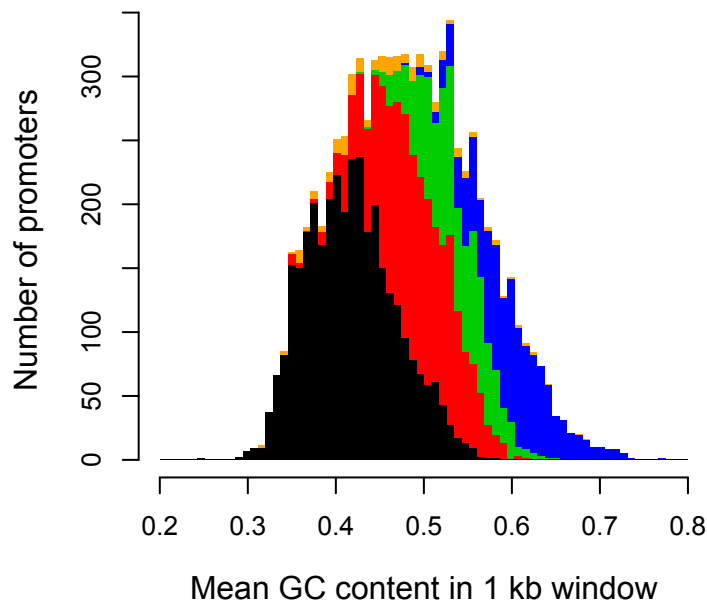

Supplement: gb-2014-15-6-r85-S8.pdf [file gb-2014-15-6-r85-S8.pdf]
