# Supplementary material for: Characteristic bimodal profiles of RNA polymerase II at thousands of active mammalian promoters
Source: PubMed Central journal article supplement (PMC4197824; doi:10.1186/gb-2014-15-6-r85), 2014-06-12

**a** Correlation between methods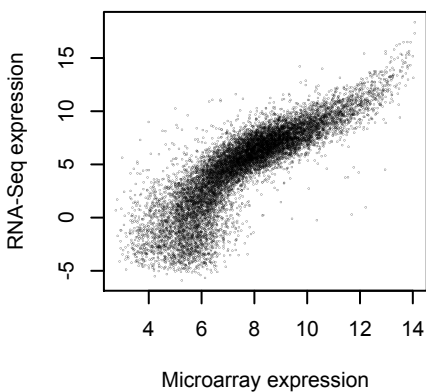**b** Correlation after normalization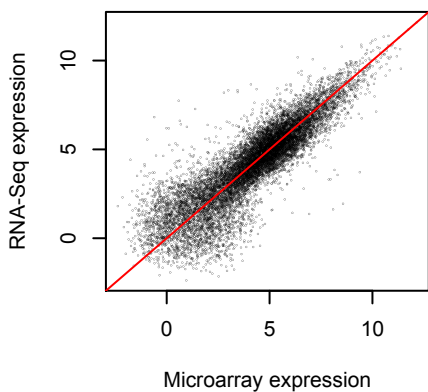**c**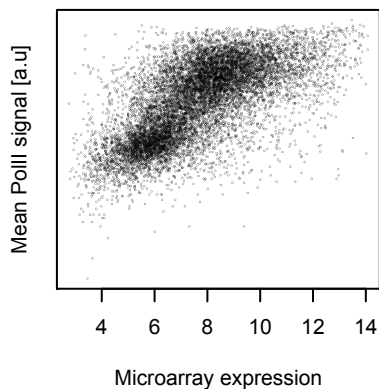**d**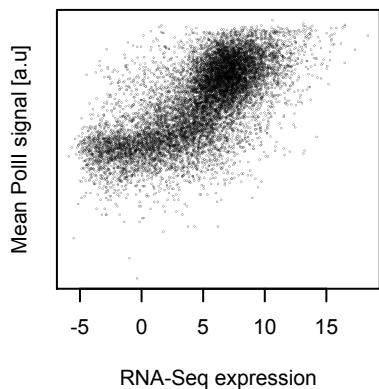**e** PolII for quantiles of RNA-Seq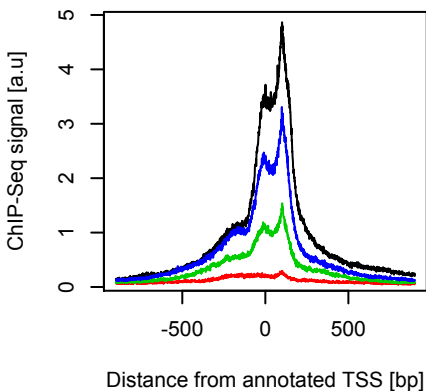**f** PolII for quantiles of Microarray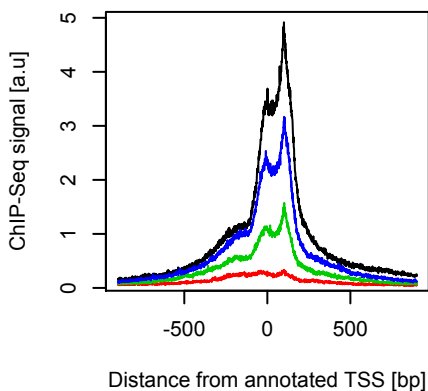

Supplement: gb-2014-15-6-r85-S9.pdf [file gb-2014-15-6-r85-S9.pdf]
